# Supplementary material
Source: PubMed Central journal article supplement (PMC7815246)
Supplement: NIHMS1660255-supplement-sup6.pdf [file NIHMS1660255-supplement-sup6.pdf]

## **Common regulatory targets of NFIA, NFIX and NFIB during postnatal cerebellar development.**

James Fraser<sup>1,\*</sup>, Alexandra Essebier<sup>2,\*</sup>, Alexander S. Brown<sup>5</sup>, Raul Ayala Davila<sup>1</sup>, Danyon Harkins<sup>1</sup>, Oressia Zalucki<sup>1</sup>, Lauren P. Shapiro<sup>6</sup>, Peter Penzes<sup>6</sup>, Brandon J. Wainwright<sup>3</sup>, Matthew P. Scott<sup>5</sup>, Richard M. Gronostajski<sup>7</sup>, Mikael Bodén<sup>2</sup>, Michael Piper<sup>1,4,#</sup> and Tracey J. Harvey<sup>1,#</sup>

<sup>1</sup>The School of Biomedical Sciences, <sup>2</sup>The School of Chemistry and Molecular Bioscience  
<sup>3</sup>Institute for Molecular Bioscience and <sup>4</sup>Queensland Brain Institute, The University of Queensland, Brisbane, 4072, Australia.

<sup>5</sup>Department of Developmental Biology, Stanford University School of Medicine, Stanford, CA, USA

<sup>6</sup>Department of Physiology, Northwestern University Feinberg School of Medicine, Chicago, IL, USA

<sup>7</sup>Department of Biochemistry, Program in Genetics, Genomics and Bioinformatics, Center of Excellence in Bioinformatics and Life Sciences, State University of New York at Buffalo, Buffalo, NY, USA

Ψ Authors for correspondence: Michael Piper  
Email: [m.piper@uq.edu.au](mailto:m.piper@uq.edu.au)  
Tracey Harvey  
Email: [t.harvey1@uq.edu.au](mailto:t.harvey1@uq.edu.au)

\*,# These authors contributed equally to this work.

Conflict of interest: None

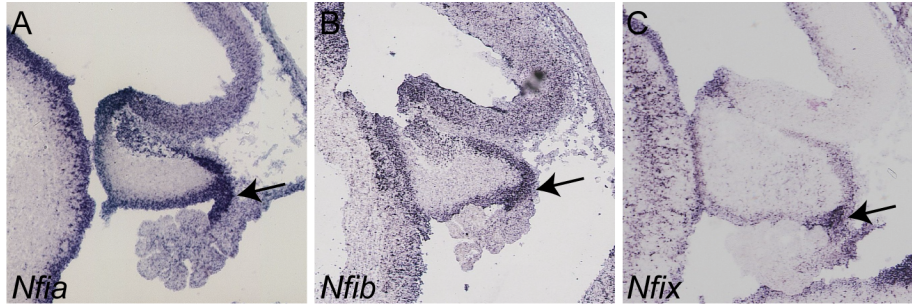

**Supplementary Figure 1. Expression of *Nfia*, *Nfib* and *Nfix* within the embryonic rhombic lip.**

Sagittal sections of E14.5 mouse brains, showing the expression of *Nfia* (A), *Nfib* (B) and *Nfix* (C) within the rhombic lip (arrows in A-C). These data are derived from the online repository, GenePaint - <https://gp3.mpg.de/>.

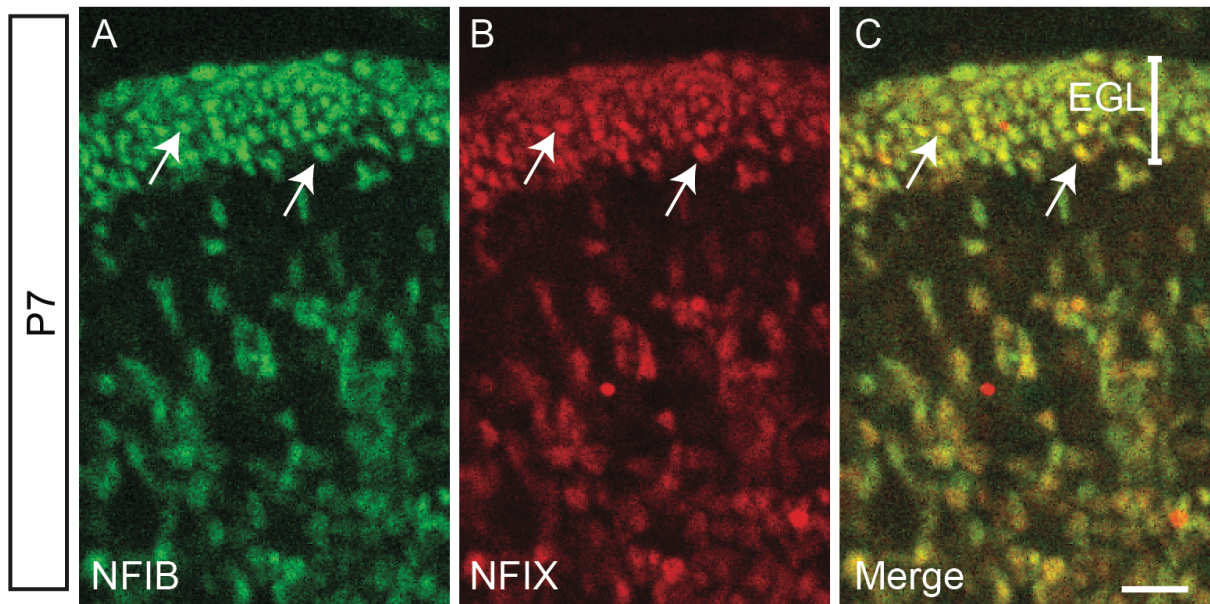

**Supplementary Figure 2. NFIX and NFIB are co-expressed by GNPs within the EGL of the P7 mouse cerebellum.**

Sagittal P7 cerebellar sections showing the expression of NFIB (A, green) and NFIX (B, red), with the merged channels shown in C. NFIX and NFIB are co-expressed by GNPs within the EGL at this age (arrows in A-C). EGL = external granule layer. Scale bar (in C): 20  $\mu$ m.

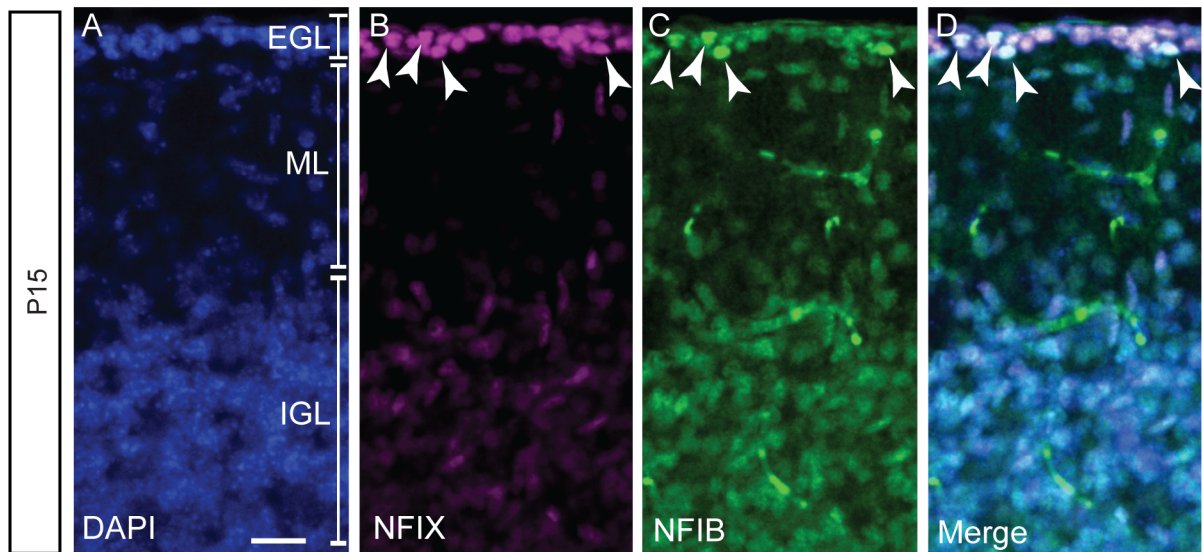

**Supplementary Figure 3. NFIX and NFIB are co-expressed by GNPs within the EGL of the P15 mouse cerebellum.**

Sagittal P15 cerebellar sections showing the nuclear marker DAPI (A, blue), NFIX (B, magenta) and NFIB (C, green), with the merged channels shown in D. NFIX and NFIB are co-expressed by GNPs within the EGL at this age (arrowheads in B-D). EGL = external granule layer; ML = molecular layer; IGL = internal granule layer. Scale bar (in A): 20  $\mu$ m.

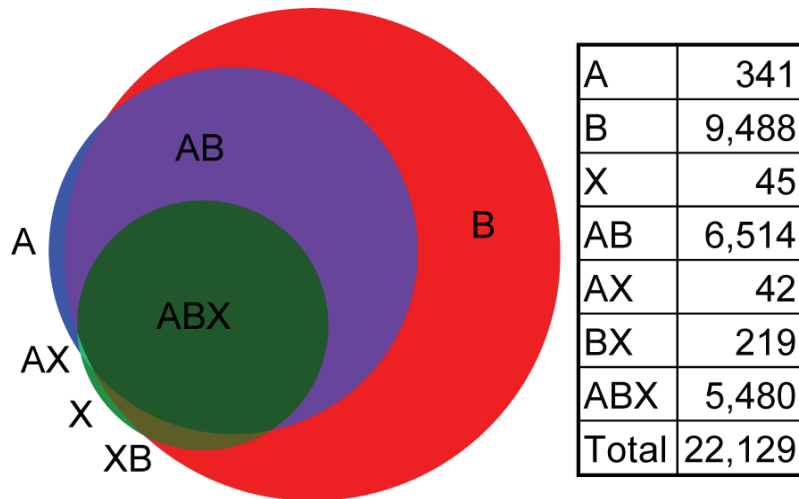

**Supplementary Figure 4. Overlap of NFI ChIP-seq peaks in regions of accessible chromatin.**

Venn diagram revealing the overlap in common binding events in regions of accessible chromatin in our NFIA-, NFIB- and NFI-X-ChIPseq datasets. The Table to the right details the number of unique and shared events from the total of 22,129 sites with at least one NFI binding event associated with it.
